# Supplementary material
Source: publisher figshare collection journal article supplement (https://karger.figshare.com/ndownloader/files/12525749)
Supplement: Supplementary file 1 [file 12525749]

## Sheet: Sheet1
Supplementary Table 1F: Hypoglycemia and Growth
	Diazoxide	Somatostatin	Growth hormone
Angola	No	No	No
Benin	No	No	No
Botswana	No	No	No
Burkina Faso	No	No	No
Burundi	No	No	No
Cameroon	No	No	No
Cape Verde	No	No	No
Central African Republic	No	No	No
Chad	No	No	No
Congo	No	No	No
Cote Ivoire	No	No	No
Democratic Republic of Congo	No	No	No
Eritrea	No	No	No
Ethiopia	No	No	No
Gabon	No	No	No
Gambia	No	No	No
Ghana	No	No	No
Guinea	No	No	No
Guinea-Bissau	No	No	No
Kenya	No	No	No
Lesotho	No	No	No
Liberia	No	No	No
Madagascar	No	No	No
Malawi	No	No	No
Mali	No	No	No
Mauritania	No	No	No
Mozambique	No	No	No
Namibia	No	No	No
Niger	No	No	No
Nigeria	No	No	No
Rwanda	No	No	No
Senegal	No	No	No
Seychelles	No	No	No
Sierra Leone	No	No	No
South Africa	No	Yes	No
Southern Sudan	No	No	No
Swaziland	No	No	No
Tanzania	No	Yes	No
Togo	No	No	No
Uganda	No	No	No
Zambia	No	No	No
Zimbabwe	No	No	No
